# Supplementary material
Source: Research Square preprint supplement (doi:10.21203/rs.3.rs-6843287/v1)
Supplement: Supplementary file 1 [file 66a7a35cb0e1dd761df1496d.pdf]

# SUPPLEMENTAL APPENDIX for "A multimodal deep reinforcement learning framework for multi-period inventory decision-making under demand uncertainty"

Yu-Xin Tian<sup>a</sup>, Chuan Zhang<sup>a,\*</sup>

<sup>a</sup>*School of Business Administration, Northeastern University, Shenyang, 110169, China*

## Appendix A. The time difference correlation analysis (TDCA) method

This section introduces the principles and process of feature selection using the TDCA method. Denote the total candidate feature number as  $N_f$ , let  $L$  ( $L > 0$ ) represent the lag period of a feature sequence ahead of the arrival time, and  $L_{\max}$  be the maximum lag period ( $L \leq L_{\max}$ ). The expression of the candidate feature set is

$$\mathbb{F}_L = \left\{ \mathbf{F}_{1,L}, \mathbf{F}_{2,L}, \dots, \mathbf{F}_{n,L}, \dots, \mathbf{F}_{N_f,L} \right\}, L = 1, 2, \dots, L_{\max}, \quad (\text{A.1})$$

where  $\mathbf{F}_{n,L}$  represents a feature sequence.

We assess the correlation between the target and the feature sequences at various lag periods to optimally choose features for model training. Metrics for correlation measurement encompass the distance correlation coefficient (Székely et al., 2007), Pearson correlation coefficient (Rodgers and Nicewander, 1988), and Spearman correlation coefficient (Myers et al., 2010) and the copula entropy (Ma, 2021; Schnaubelt, 2022). We extensively employ these correlation coefficients, and the assessment criterion is determined by taking the maximum of their absolute values. Let  $\mathbf{D}$  represent the demand sequence ending at the arrival time. The formula for the absolute correlation is expressed as

$$f_R(\mathbf{F}_{n,L}, \mathbf{D}) = \max_{f \in \{\text{Distance}, \text{Pearson}, \text{Spearman}, \text{CopEnt}\}} |f(\mathbf{F}_{n,L}, \mathbf{D})|, \quad (\text{A.2})$$

where "Distance", "Spearman", "Pearson", and "CopEnt" is the function of the distance correlation, Pearson, Spearman and the copula entropy, respectively. The implementation process are as follows:

First, initiate the screening process for candidate features by computing the absolute correlation between each feature sequence with various lag periods before the arrival time and the demand sequence at the arrival time, utilizing Eq. (A.2). Establish an appropriate screening

threshold  $\hat{r}_1$ , as the screening criterion, representing the minimum correlation between the demand and the selected features. Features meeting the condition  $f_R(\mathbf{F}_{n,L}, \mathbf{D}) \geq \hat{r}_1$  are chosen, and the set of selected features is defined as  $\mathcal{X}$ .

Second, to address multicollinearity among the initially screened features, the Pearson correlation coefficient is employed. The removal criterion is defined by the threshold  $\hat{r}_2$ , which represents the maximum permissible correlation among the chosen features. Feature pairs with high linear correlation in set  $\mathcal{X}$  are identified, and the feature with the relatively weaker correlation to the demand sequence is removed from the set. Negative correlations are also considered in this procedure, as highly anti-correlated input features are also collinear.

Finally, repeat the second step, until the Pearson correlation between any two features in set  $\mathcal{X}$  is no longer greater than  $\hat{r}_2$ . Consequently, the features in set  $\mathcal{X} = \{\mathbf{x}_1, \mathbf{x}_2, \dots, \mathbf{x}_{N_p}\}$  represent the selected appropriate features, with the feature count  $N_p$ .

We extract the values of each feature in the features set  $\mathcal{X}$  at time  $t$ , represented as  $x_{n,t} \in \mathbf{x}_n$ , to form the demand-related feature vector at time  $t$ , expressed as

$$\mathbf{X}_t = (x_{1,t}, x_{2,t}, \dots, x_{N_p,t}). \quad (\text{A.3})$$

Here, the screening thresholds and relevant removal criteria are hyperparameters determined through repeated experiments.

## Appendix B. Transformer

The Transformer model, introduced by Vaswani et al. (2017), is a machine learning model designed for natural language processing tasks, with the self-attention mechanism as its core component. The structure of the Transformer is shown in Fig. B.1.

Transformer adopts a Seq2Seq structure composed of an encoder and a decoder. The encoder maps the input sequence into a fixed-length vector representation, and the decoder transforms the fixed-length vector into an output sequence. Both the encoder and the decoder consist of multiple identical layers, each containing a self-attention mechanism and a feed-forward neural network. The self-attention mechanism assigns a weight to each position by computing the similarity between that position and all others in the input sequence, thereby computing a weighted average that incorporates information from the entire sequence. The principles of each component are described as follows:

### (1) *Self-attention mechanism*

The self-attention mechanism is the core component of Transformer. It computes the similarity between each position (word) in the input sequence and all other positions to assign weights, thus generating a weighted average for each word vector that incorporates context. The specific computation process is as follows:

**Query, key, and value matrices:** The input sequence  $X$  is transformed by three different linear layers to generate the query matrix  $Q$ , the key matrix  $K$ , and the value matrix  $V$ :

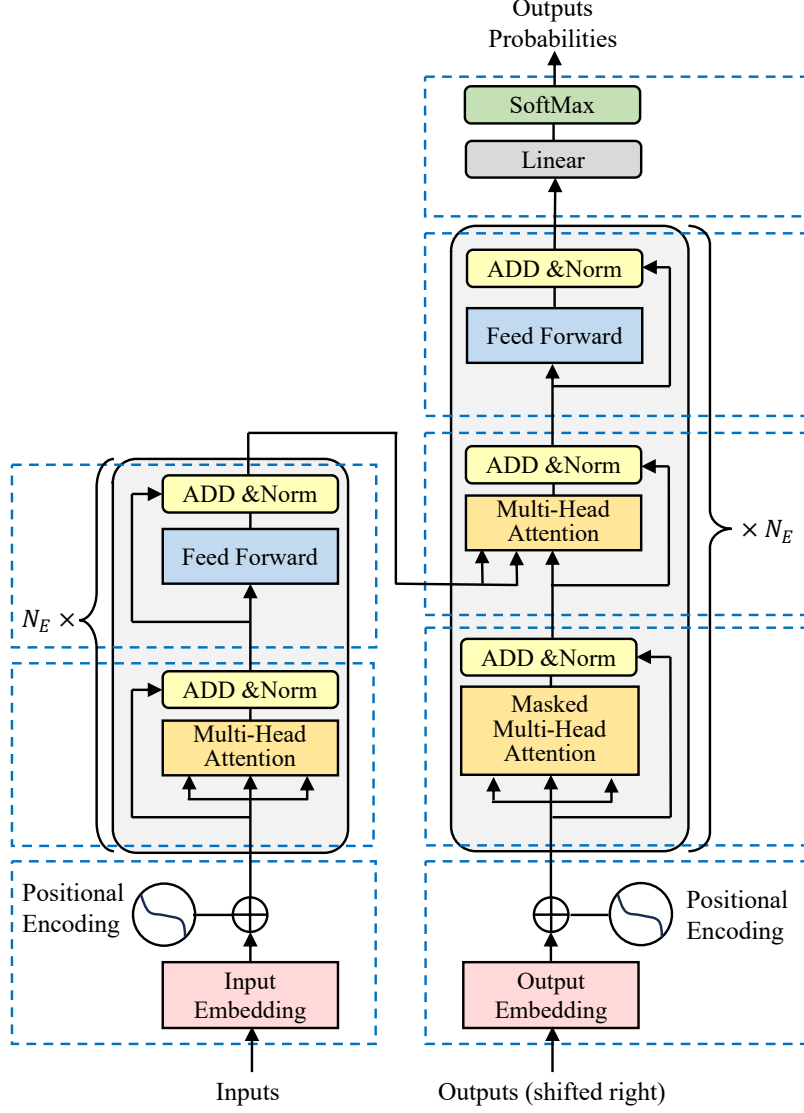

**Fig. B.1.** The structure of Transformer

$$Q = XW^Q, K = XW^K, V = XW^V, \quad (\text{B.1})$$

where  $X$  represents the input sequence, and  $W^Q$ ,  $W^K$ , and  $W^V$  are trainable weight matrices.

**Attention scores:** The dot product is computed between the query matrix  $Q$  and the key matrix  $K$ . Since the dimensionality  $d_K$  of the key vectors affects Transformer performance, the result is scaled by  $\sqrt{d_K}$ , and then normalized using the SoftMax function:

$$\text{Attention}(Q, K, V) = \text{soft max} \left( \frac{QK^T}{\sqrt{d_K}} \right) V. \quad (\text{B.2})$$

**Multi-head attention mechanism:** Multiple independent self-attention heads are introduced to enhance the model's capability, with each head operating in a different subspace. The formula for multi-head attention Mhead is as follows:

$$\text{Mhead}(Q, K, V) = \text{Concat}(\text{head}_1, \text{head}_2, \dots, \text{head}_{N_h})W^O, \quad (\text{B.3})$$

where  $\text{head}_i = \text{Attention}(QW_i^Q, KW_i^K, VW_i^V)$ , and  $W^O$  is a linear transformation matrix. The number of attention heads  $N_h$  is set to 4 in our experiment. Each head has its own set of weight matrices  $W_i^Q$ ,  $W_i^K$ , and  $W_i^V$ .

(2) *Feed-forward neural network (FFN)*

The output at each position from the self-attention mechanism is processed by a feed-forward neural network, which consists of two linear transformations and a ReLU activation function  $\max(0, \cdot)$ :

$$\text{FFN}(x) = \max(0, xW_1 + b_1)W_2 + b_2. \quad (\text{B.4})$$

(3) *Residual connections and layer normalization*

To alleviate the vanishing gradient problem in deep networks, Transformer applies residual connections after both the self-attention and feed-forward sublayers, followed by layer normalization. The output of each sublayer is:

$$\text{LayerNorm}(x + \text{Sublayer}(x)), \quad (\text{B.5})$$

where  $\text{Sublayer}(x)$  represents the function implemented by that sublayer.

(4) *Encoder and decoder*

Overall, Transformer consists of stacked encoder and decoder components. The encoder maps the input sequence into a fixed-length vector representation, and the decoder transforms this representation into the output sequence. Both the encoder and decoder are composed of  $N_E$  identical layers, each including multi-head self-attention and a feed-forward neural network. The computation steps of the encoder layer are:

$$x := \text{LayerNorm}(x + \text{FFN}(x)), \quad (\text{B.6})$$

$$\text{EncoderLayer}(x) = \text{LayerNorm}(x + \text{MHead}(x, x, x)). \quad (\text{B.7})$$

In addition to the two sublayers in the encoder layer, the decoder layer includes a masked multi-head self-attention mechanism sublayer  $\text{MaskedMHead}$ . Similar to the encoder, residual connections and layer normalization are applied around each sublayer. The decoder layer computations are:

$$y := \text{LayerNorm}(y + \text{FFN}(y)), \quad (\text{B.8})$$

$$y := \text{LayerNorm}(y + \text{MHead}(y, \varrho, \varrho)), \quad (\text{B.9})$$

$$\text{DecoderLayer}(y, \varrho) = \text{LayerNorm}(y + \text{MaskedMHead}(y, y, y)), \quad (\text{B.10})$$

where  $\varrho$  denotes the output of the encoder layer.

### (5) Positional encoding

Since Transformer lacks recurrence and convolution, it must be supplied with information about the positions of tokens in a sequence. To provide this, positional encodings are added to the input/output embeddings at the bottom of the encoder and decoder stacks. These encodings are defined using sine and cosine functions:

$$PE_{(pos,2i)} = \sin\left(pos/10000^{2i/v}\right), \quad (\text{B.11})$$

$$PE_{(pos,2i+1)} = \cos\left(pos/10000^{2i/v}\right), \quad (\text{B.12})$$

where  $pos$  represents the position index,  $i$  is the dimension index, and  $v$  is the embedding dimension.

## Appendix C. Candidate macroeconomic indicators and Baidu indices

The candidate features before being screened using the TDCA method include 86 macroeconomic indicators and keywords from the Baidu search indices, as shown in Table C.1 and Table C.2, respectively.

**Table C.1.** List of candidate macroeconomic indicators

| No. | Name                                                                                     | No. | Name                                                          |
|-----|------------------------------------------------------------------------------------------|-----|---------------------------------------------------------------|
| 1   | China: CPI: YoY                                                                          | 44  | China: Financial Institutions: Foreign Currency Loans Balance |
| 2   | China: CPI: Transport and Communications: Transportation Facility: YoY                   | 45  | China: Financial Institutions: New Foreign Total Loans        |
| 3   | China: CPI: Transport and Communications: Fuels for Transport Facility: YoY              | 46  | China: Financial Institutions: Total Deposits Balance: RMB    |
| 4   | China: CPI: Transport and Communications: Use and Maintenance of Transport Facility: YoY | 47  | China: Financial Institutions: New RMB Deposits               |
| 5   | China: CPI: MoM                                                                          | 48  | China: Financial Institutions: New RMB Deposits: Households   |
| 6   | China: CPI: Transport and Communications: Transportation Facility: MoM                   | 49  | China: Demand Deposit Interest Rate                           |
| 7   | China: CPI: Transport and Communications: Fuels for Transport Facility: MoM              | 50  | China: Time Deposit Rate: 3M                                  |

*(Continued on next page)*

*(Continued from previous page)*

| No. | Name                                                                                                     | No. | Name                                                                |
|-----|----------------------------------------------------------------------------------------------------------|-----|---------------------------------------------------------------------|
| 8   | China: CPI: Transport and Communications: Use and Maintenance of Transport Facility: MoM                 | 51  | China: Time Deposit Rate: 6M                                        |
| 9   | China: RPI: MoM                                                                                          | 52  | China: Short-term Loan Interest Rate: 6M (Incl.)                    |
| 10  | China: RPI: Transportation and Communication Appliances: MoM                                             | 53  | China: Short-term Loan Interest Rate: 6M-1Y (Inclusive)             |
| 11  | China: RPI: Fuels: MoM                                                                                   | 54  | Chinaedium and Long-term Lending Rates: 1Y-3Y (Inclusive)           |
| 12  | China: PPI: Total Industry Products: YoY                                                                 | 55  | Chinaedium and Long-term Lending Rates: 3Y-5Y (Inclusive)           |
| 13  | China: PPI: Total Industry Products: MoM                                                                 | 56  | Chinaedium and Long-term Lending Rates: Above 5Y                    |
| 14  | China: PPI: Consumer Goods: Durable Consumer Goods: YoY                                                  | 57  | China: SH and SZ Stock Markets: Total Market Value (A and B Shares) |
| 15  | China: PPI: Extraction of Petroleum and Natural Gas: MoM                                                 | 58  | China: SH and SZ Stock Markets: Total Stock Turnover                |
| 16  | China: PPI: Manufacture of Rubber and Plastic Products: MoM                                              | 59  | SSE: Average P/E Ratio                                              |
| 17  | China: PPI: Manufacture of Automobile: MoM                                                               | 60  | SSE Conglomerates Index                                             |
| 18  | China: Purchasing Price Index of Raw Material,Fuel and Power: MoM                                        | 61  | CSI 300 Index                                                       |
| 19  | Purchasing Price Index of Raw Material,Fuel and Power: Fuel and Power: YoY                               | 62  | SZSE Component Index                                                |
| 20  | China: CGPI: YoY                                                                                         | 63  | SSE T-Bond Index: Closing                                           |
| 21  | China: CGPI: MoM                                                                                         | 64  | SSE Corporate Bond Index: Closing                                   |
| 22  | China: Export Unit Value Index: HS2: Total Index                                                         | 65  | Futures Settlement Price (Active Contract): Deformed Steel Bar      |
| 23  | China: Export Price Index: HS2: Class 17: Vehicles, Aircraft, Vessels and Associated Transport Equipment | 66  | Futures Settlement Price (Active Contract): Natural Rubber          |
| 24  | China: Import Unit Value Index: HS2: Total Index                                                         | 67  | Futures Settlement Price (Active Contract): Fuel Oil                |

*(Continued on next page)*

*(Continued from previous page)*

| No. | Name                                                                                                     | No. | Name                                                        |
|-----|----------------------------------------------------------------------------------------------------------|-----|-------------------------------------------------------------|
| 25  | China: Import Price Index: HS2: Class 17: Vehicles, Aircraft, Vessels and Associated Transport Equipment | 68  | Futures Settlement Price (Active Contract): Stainless Steel |
| 26  | China: Market Price: Gasoline (92#): China VI:MONTHLY:LAST                                               | 69  | Futures Settlement Price (Continuous): Fuel Oil             |
| 27  | China: Market Price: Gasoline (95#): China VI:MONTHLY:LAST                                               | 70  | Futures Settlement Price (Continuous): Natural Rubber       |
| 28  | China: Value of Imports and Exports: CNY                                                                 | 71  | Futures Settlement Price (Continuous): Deformed Steel Bar   |
| 29  | China: Trade Balance: CNY                                                                                | 72  | Futures Settlement Price (Continuous): Stainless Steel      |
| 30  | China: M0                                                                                                | 73  | China: Macro-economic Climate Index: Coincident Index       |
| 31  | China: M1                                                                                                | 74  | China: Macro-economic Climate Index: Leading Index          |
| 32  | China: M2                                                                                                | 75  | China: Macro-economic Climate Index: Lagging Index          |
| 33  | China: M0: YoY                                                                                           | 76  | China: Surveyed Urban Unemployment Rate                     |
| 34  | China: M1: YoY                                                                                           | 77  | Surveyed Urban Unemployment Rate in 31 Big Cities and Towns |
| 35  | China: M2: YoY                                                                                           | 78  | China: Surveyed Urban Unemployment Rate: YoY                |
| 36  | China: Financial Institutions: Total Loans Balance: RMB                                                  | 79  | China: Manufacturing PMI                                    |
| 37  | China: Financial Institutions: Total Loans Balance: RMB: YoY                                             | 80  | China: Manufacturing PMI: Production                        |
| 38  | China: Financial Institutions: New RMB Loans                                                             | 81  | China: Manufacturing PMI: Large Enterprises                 |
| 39  | China: Financial Institutions: New RMB Loans: Households                                                 | 82  | China: Manufacturing PMI: Medium-sized Enterprises          |
| 40  | China: Financial Institutions: New RMB Loans: Households: Short-term                                     | 83  | China: Manufacturing PMI: Small Enterprises                 |
| 41  | China: Financial Institutions: New RMB Loans: Households: Mid & Long-term                                | 84  | China: Consumer Confidence Index                            |

*(Continued on next page)*

(Continued from previous page)

| No. | Name                                                              | No. | Name                               |
|-----|-------------------------------------------------------------------|-----|------------------------------------|
| 42  | China: Financial Institutions: Short-term Loans Balance: RMB      | 85  | China: Consumer Satisfaction Index |
| 43  | China: Financial Institutions: Mid & Long-term Loans Balance: RMB | 86  | China: Consumer Expectation Index  |

**Table C.2.** Baidu index keyword sets

| Topics or products          | Baidu Index keywords                                                                                                                                                                                                                                                                                                                                                                                                                                                                                                          |
|-----------------------------|-------------------------------------------------------------------------------------------------------------------------------------------------------------------------------------------------------------------------------------------------------------------------------------------------------------------------------------------------------------------------------------------------------------------------------------------------------------------------------------------------------------------------------|
| Automobile industry related | 汽车保险 (Car Insurance), 汽车官网 (Car Official Website), 汽车摇号 (Car Lottery), 汽车新闻 (Car News), 汽车点评 (Car Review), 汽车购置税 (Car Purchase Tax), 汽车销量 (Car Sales), 汽车销量排行 (Car Sales Ranking), 汽车销量排行榜 (Car Sales Ranking List)                                                                                                                                                                                                                                                                                                           |
| Lavida                      | 一汽大众 (Faw-Volkswagen), 大众 (Volkswagen), 大众4s店 (Volkswagen 4S Dealership), 大众朗逸价格 (Volkswagen Lavida Price), 大众朗逸怎么样 (How Is the Volkswagen Lavida), 大众朗逸报价 (Volkswagen Lavida Quote), 大众朗逸报价及图片 (Volkswagen Lavida Quote and Pictures), 大众汽车官网 (Volkswagen Official Website), 朗逸 (Lavida), 朗逸价格 (Lavida Price), 朗逸多少钱 (How Much Is Lavida), 朗逸怎么样 (How Is the Lavida), 朗逸报价 (Lavida Quote), 朗逸最新报价 (Latest Quote of Lavida), 朗逸汽车 (Lavida Car), 朗逸油耗 (Lavida Fuel Consumption), 朗逸论坛 (Lavida Forum), 大众朗逸 (Volkswagen Lavida) |
| Emgrand                     | 吉利帝豪 (Geely Emgrand), 吉利帝豪怎么样 (How Is Geely Emgrand), 吉利 (Geely), 吉利汽车 (Geely Automobile), 吉利4s店 (Geely 4S Dealership), 帝豪 (Emgrand), 帝豪汽车 (Emgrand Automobile), 吉利帝豪报价 (Geely Emgrand Price)                                                                                                                                                                                                                                                                                                                                 |
| Haval H6                    | 哈弗h6 (Haval H6), 哈弗h6报价 (Haval H6 Quote), 哈弗h6怎么样 (How About Haval H6), 哈弗h6运动版 (Haval H6 Sport Edition), 哈弗h6油耗 (Fuel Consumption of Haval H6), 哈弗h6新款 (New Version of Haval H6), 哈弗 (Haval), 哈弗汽车 (Haval Cars), 哈弗官网 (Official Website of Haval)                                                                                                                                                                                                                                                                            |
| Camry                       | 凯美瑞 (Camry), 凯美瑞油耗 (Fuel Consumption of Camry), 凯美瑞怎么样 (How about Camry?), 凯美瑞论坛 (Camry Forum), 凯美瑞2.0 (Camry 2.0), 凯美瑞多少钱 (How Much Is Camry), 凯美瑞报价 (Camry Quote), 凯美瑞汽车 (Camry Automobile), 丰田凯美瑞 (Toyota Camry), 丰田凯美瑞报价 (Toyota Camry Quote)                                                                                                                                                                                                                                                                             |

## Appendix D. Selected numerical features and their correlation coefficients

Tables D.1–D.4 present the demand-related feature selection results for the four products. In our experiments, the threshold parameters are set as follows: for the Lavida experiment,  $\hat{r}_1 = 0.35$  and  $\hat{r}_2 = 0.7$ ; for the Emgrand experiment,  $\hat{r}_1 = 0.35$  and  $\hat{r}_2 = 0.7$ ; for the Haval H6 experiment,  $\hat{r}_1 = 0.45$  and  $\hat{r}_2 = 0.7$ ; and for the Camry experiment,  $\hat{r}_1 = 0.4$  and  $\hat{r}_2 = 0.7$ .



**Table D.1.** Structured feature selection results for the Lavida experiment

| Feature Name                                                                             | Lag order | Correlation     |
|------------------------------------------------------------------------------------------|-----------|-----------------|
| China: CPI: Transport and Communications: Transportation Facility: MoM                   | 3         | CopEnt=-0.366   |
| China: CPI: Transport and Communications: Transportation Facility: MoM                   | 6         | Spearman=-0.411 |
| China: CPI: Transport and Communications: Transportation Facility: MoM                   | 9         | CopEnt=-0.400   |
| China: CPI: Transport and Communications: Use and Maintenance of Transport Facility: MoM | 11        | Pearson=0.377   |
| China: RPI: Transportation and Communication Appliances: MoM                             | 5         | Distance=0.351  |
| China: RPI: Transportation and Communication Appliances: MoM                             | 6         | Distance=0.460  |
| China: PPI: Manufacture of Rubber and Plastic Products: MoM                              | 1         | CopEnt=-0.368   |
| China: PPI: Manufacture of Rubber and Plastic Products: MoM                              | 2         | CopEnt=-0.378   |
| China: PPI: Manufacture of Rubber and Plastic Products: MoM                              | 4         | CopEnt=-0.360   |
| China: PPI: Manufacture of Rubber and Plastic Products: MoM                              | 7         | CopEnt=-0.414   |
| China: PPI: Manufacture of Automobile: MoM                                               | 2         | CopEnt=0.509    |
| China: PPI: Manufacture of Automobile: MoM                                               | 3         | CopEnt=0.582    |
| China: PPI: Manufacture of Automobile: MoM                                               | 4         | CopEnt=0.566    |
| China: PPI: Manufacture of Automobile: MoM                                               | 5         | CopEnt=0.479    |
| China: PPI: Manufacture of Automobile: MoM                                               | 6         | CopEnt=0.420    |
| China: PPI: Manufacture of Automobile: MoM                                               | 7         | CopEnt=0.491    |
| China: PPI: Manufacture of Automobile: MoM                                               | 8         | CopEnt=0.668    |
| China: PPI: Manufacture of Automobile: MoM                                               | 9         | CopEnt=0.553    |
| China: PPI: Manufacture of Automobile: MoM                                               | 10        | CopEnt=0.716    |
| China: PPI: Manufacture of Automobile: MoM                                               | 11        | CopEnt=0.733    |
| China: Trade Balance: CNY                                                                | 8         | Distance=0.361  |
| China: M2: YoY                                                                           | 2         | CopEnt=-0.385   |
| China: Financial Institutions: New RMB Loans                                             | 1         | Pearson=-0.415  |
| China: Financial Institutions: New RMB Loans Households                                  | 2         | Distance=0.355  |

*(Continued on next page)*

(Continued from previous page)

| Feature Name                                           | Lag order | Correlation     |
|--------------------------------------------------------|-----------|-----------------|
| China: Financial Institutions: New RMB Deposits        | 1         | Distance=0.471  |
| China: Financial Institutions: New RMB Deposits        | 6         | CopEnt=-0.394   |
| China: SH and SZ Stock Markets: Total Stock Turnover   | 1         | Spearman=-0.366 |
| Futures Settlement Price (Continuous): Fuel Oil        | 7         | CopEnt=-0.402   |
| Futures Settlement Price (Continuous): Natural Rubber  | 4         | Spearman=-0.453 |
| Futures Settlement Price (Continuous): Stainless Steel | 12        | CopEnt=0.773    |
| China: Manufacturing PMI                               | 7         | CopEnt=-0.359   |
| 大众朗逸报价 (Volkswagen Lavidia Quote)                      | 2         | CopEnt=-0.357   |
| 大众汽车官网 (Volkswagen Official Website)                   | 12        | CopEnt=-0.372   |
| 朗逸价格 (Lavidia Price)                                   | 8         | CopEnt=-0.357   |
| 朗逸油耗 (Lavidia Fuel Consumption)                        | 1         | Spearman=0.362  |
| 汽车摇号 (Car Lottery)                                     | 10        | CopEnt=-0.365   |
| 汽车购置税 (Car Purchase Tax)                               | 10        | CopEnt=-0.357   |
| 汽车销量 (Car Sales)                                       | 4         | CopEnt=-0.352   |

**Table D.2.** Structured feature selection results for the Emgrand experiment

| Feature Name                                                                             | Lag order | Correlation    |
|------------------------------------------------------------------------------------------|-----------|----------------|
| China: CPI: MoM                                                                          | 11        | Pearson=0.424  |
| China: CPI: Transport and Communications: Transportation Facility: MoM                   | 6         | Distance=0.440 |
| China: CPI: Transport and Communications: Transportation Facility: MoM                   | 8         | CopEnt=-0.374  |
| China: CPI: Transport and Communications: Transportation Facility: MoM                   | 11        | CopEnt=-0.359  |
| China: CPI: Transport and Communications: Use and Maintenance of Transport Facility: MoM | 10        | Distance=0.350 |
| China: CPI: Transport and Communications: Use and Maintenance of Transport Facility: MoM | 12        | CopEnt=-0.352  |
| China: RPI: Transportation and Communication Appliances: MoM                             | 5         | Distance=0.417 |
| China: RPI: Transportation and Communication Appliances: MoM                             | 6         | Distance=0.490 |

(Continued on next page)

(Continued from previous page)

| Feature Name                                                         | Lag order | Correlation     |
|----------------------------------------------------------------------|-----------|-----------------|
| China: PPI: Manufacture of Rubber and Plastic Products: MoM          | 2         | CopEnt=-0.401   |
| China: PPI: Manufacture of Automobile: MoM                           | 1         | CopEnt=0.434    |
| China: PPI: Manufacture of Automobile: MoM                           | 2         | CopEnt=0.367    |
| China: PPI: Manufacture of Automobile: MoM                           | 3         | CopEnt=0.532    |
| China: PPI: Manufacture of Automobile: MoM                           | 4         | CopEnt=0.492    |
| China: PPI: Manufacture of Automobile: MoM                           | 5         | CopEnt=0.561    |
| China: PPI: Manufacture of Automobile: MoM                           | 6         | CopEnt=0.634    |
| China: PPI: Manufacture of Automobile: MoM                           | 7         | CopEnt=0.599    |
| China: PPI: Manufacture of Automobile: MoM                           | 8         | CopEnt=0.862    |
| China: PPI: Manufacture of Automobile: MoM                           | 9         | CopEnt=0.738    |
| China: PPI: Manufacture of Automobile: MoM                           | 10        | CopEnt=0.712    |
| China: PPI: Manufacture of Automobile: MoM                           | 11        | CopEnt=0.818    |
| China: Value of Imports and Exports: CNY                             | 8         | Spearman=-0.364 |
| China: Financial Institutions: New RMB Loans                         | 1         | Pearson=-0.389  |
| China: Financial Institutions: New RMB Loans: Households: Short-term | 11        | Pearson=-0.415  |
| China: Financial Institutions: Foreign Currency Loans Balance        | 12        | Spearman=-0.354 |
| China: Financial Institutions: New RMB Deposits                      | 1         | Pearson=-0.387  |
| China: Financial Institutions: New RMB Deposits                      | 7         | Distance=0.358  |
| Futures Settlement Price (Continuous): Stainless Steel               | 11        | CopEnt=0.771    |
| China: Surveyed Urban Unemployment Rate                              | 1         | CopEnt=0.590    |
| China: Manufacturing PMI: Large Enterprises                          | 1         | Distance=0.392  |
| China: Manufacturing PMI: Small Enterprises                          | 11        | Distance=0.514  |
| 帝豪汽车 (Emgrand Automobile)                                            | 2         | Pearson=0.371   |
| 汽车购置税 (Car Purchase Tax)                                             | 3         | CopEnt=-0.357   |

**Table D.3.** Structured feature selection results for the Haval H6 experiment

| Feature Name                                                           | Lag order | Correlation    |
|------------------------------------------------------------------------|-----------|----------------|
| China: CPI: Transport and Communications: Transportation Facility: MoM | 5         | Distance=0.462 |
| China: CPI: Transport and Communications: Transportation Facility: MoM | 6         | Distance=0.609 |

(Continued on next page)

(Continued from previous page)

| Feature Name                                                | Lag order | Correlation     |
|-------------------------------------------------------------|-----------|-----------------|
| China: RPI: MoM                                             | 6         | Spearman=-0.469 |
| China: RPI: Transportation and Communication                | 6         | Distance=0.482  |
| Appliances: MoM                                             |           |                 |
| China: PPI: Manufacture of Automobile: MoM                  | 2         | CopEnt=0.590    |
| China: PPI: Manufacture of Automobile: MoM                  | 3         | CopEnt=0.458    |
| China: PPI: Manufacture of Automobile: MoM                  | 4         | CopEnt=0.510    |
| China: PPI: Manufacture of Automobile: MoM                  | 5         | CopEnt=0.590    |
| China: PPI: Manufacture of Automobile: MoM                  | 6         | CopEnt=0.650    |
| China: PPI: Manufacture of Automobile: MoM                  | 7         | CopEnt=0.678    |
| China: PPI: Manufacture of Automobile: MoM                  | 8         | CopEnt=0.744    |
| China: PPI: Manufacture of Automobile: MoM                  | 9         | CopEnt=0.507    |
| China: PPI: Manufacture of Automobile: MoM                  | 10        | CopEnt=0.466    |
| China: PPI: Manufacture of Automobile: MoM                  | 11        | CopEnt=0.870    |
| China: Value of Imports and Exports: CNY                    | 8         | Spearman=-0.552 |
| China: M1: YoY                                              | 2         | Distance=0.534  |
| China: Financial Institutions: New RMB Loans                | 1         | Spearman=-0.456 |
| Futures Settlement Price (Active Contract): Stainless Steel | 12        | CopEnt=0.842    |
| China: Macro-economic Climate Index: Leading Index          | 1         | Pearson=0.459   |
| China: Manufacturing PMI: Small Enterprises                 | 10        | Distance=0.556  |
| China: Manufacturing PMI: Small Enterprises                 | 11        | Spearman=-0.548 |
| 哈弗官网 (Official Website of Haval)                            | 1         | Spearman=0.549  |

**Table D.4.** Structured feature selection results for the Camry experiment

| Feature Name                                                | Lag order | Correlation   |
|-------------------------------------------------------------|-----------|---------------|
| China: PPI: Manufacture of Rubber and Plastic Products: MoM | 2         | CopEnt=-0.453 |
| China: PPI: Manufacture of Automobile: MoM                  | 2         | CopEnt=0.446  |
| China: PPI: Manufacture of Automobile: MoM                  | 3         | CopEnt=0.605  |
| China: PPI: Manufacture of Automobile: MoM                  | 4         | CopEnt=0.989  |
| China: PPI: Manufacture of Automobile: MoM                  | 5         | CopEnt=0.563  |
| China: PPI: Manufacture of Automobile: MoM                  | 6         | CopEnt=0.582  |
| China: PPI: Manufacture of Automobile: MoM                  | 7         | CopEnt=0.636  |
| China: PPI: Manufacture of Automobile: MoM                  | 8         | CopEnt=0.565  |

(Continued on next page)

(Continued from previous page)

| Feature Name                                     | Lag order | Correlation     |
|--------------------------------------------------|-----------|-----------------|
| China: PPI: Manufacture of Automobile: MoM       | 9         | CopEnt=0.534    |
| China: PPI: Manufacture of Automobile: MoM       | 10        | CopEnt=0.598    |
| China: PPI: Manufacture of Automobile: MoM       | 11        | CopEnt=0.860    |
| China: Export Unit Value Index: HS2: Total Index | 12        | Distance=0.474  |
| China: Value of Imports and Exports: CNY         | 12        | Spearman=0.734  |
| China: Financial Institutions: New RMB Loans     | 4         | Spearman=0.484  |
| China: Financial Institutions: New RMB Loans     | 10        | Distance=0.441  |
| China: Financial Institutions: New RMB Loans     | 12        | Pearson=0.501   |
| China: Financial Institutions: New RMB Loans:    | 12        | Distance=0.597  |
| Households                                       |           |                 |
| China: Financial Institutions: New RMB Loans:    | 4         | Distance=0.408  |
| Households: Short-term                           |           |                 |
| China: Financial Institutions: New RMB Loans:    | 7         | Distance=0.404  |
| Households: Short-term                           |           |                 |
| China: Financial Institutions: New RMB Loans:    | 10        | Distance=0.485  |
| Households: Short-term                           |           |                 |
| Futures Settlement Price (Continuous): Deformed  | 12        | Distance=0.711  |
| Steel Bar                                        |           |                 |
| Futures Settlement Price (Continuous): Stainless | 12        | CopEnt=0.933    |
| Steel                                            |           |                 |
| China: Manufacturing PMI: Small Enterprises      | 8         | Spearman=0.417  |
| China: Manufacturing PMI: Small Enterprises      | 9         | Distance=0.405  |
| China: Manufacturing PMI: Small Enterprises      | 12        | Spearman=0.618  |
| 凯美瑞油耗 (Fuel Consumption of Camry)                | 3         | Distance=0.436  |
| 凯美瑞油耗 (Fuel Consumption of Camry)                | 12        | Distance=0.440  |
| 丰田凯美瑞 (Toyota Camry)                             | 7         | Distance=0.420  |
| 汽车保险 (Car Insurance)                             | 5         | Spearman=-0.723 |
| 汽车摇号 (Car Lottery)                               | 8         | Spearman=-0.595 |
| 汽车摇号 (Car Lottery)                               | 12        | Distance=0.478  |
| 汽车销量排行 (Car Sales Ranking)                       | 2         | Spearman=-0.451 |
| 汽车销量排行 (Car Sales Ranking)                       | 4         | Spearman=-0.522 |
| 汽车销量排行 (Car Sales Ranking)                       | 6         | Spearman=-0.529 |
| 汽车销量排行 (Car Sales Ranking)                       | 8         | Spearman=-0.485 |
| 汽车销量排行 (Car Sales Ranking)                       | 10        | Spearman=-0.494 |

## Appendix E. Description of benchmark methods

In our experiments, the benchmark methods used for comparison include the  $(S, s)$ , DQN, A2C, SAC, PPO, and DDPG. Detailed descriptions are as follows:

(1)  $(S, s)$  Policy (Arrow et al., 1958): This is a classical periodic inventory control strategy. The core rule is: at the end of each period, the inventory level is checked; if the current inventory is less than or equal to threshold  $s$  (reorder point), a replenishment is triggered to raise the inventory to the target level  $S$ ; otherwise, no replenishment is performed.  $S$  and  $s$  are determined based on historical sales statistics such as the mean and standard deviation, where  $s$  is set to the historical mean demand and  $S$  is calculated as:

$$S = \mu + z \times \sigma, \quad z = \Phi^{-1} \left( \frac{c_b}{c_b + c_h} \right), \quad (\text{E.1})$$

where  $\Phi^{-1}$  is the inverse of the standard normal distribution, and  $\mu$  and  $\sigma$  represent the estimated mean and standard deviation of demand based on historical sales.

(2) DQN (Deep Q-Network) (Oroojlooyjadid et al., 2021): This method integrates deep neural networks with reinforcement learning. Its core idea is to approximate the Q-value function (i.e., state-action value function) using a neural network, thereby learning the optimal policy in complex environments. In the multi-period inventory context, DQN defines a discrete action space by evenly dividing the range between the minimum and maximum historical demand values (e.g., 10,000 discrete replenishment quantities). The policy is optimized by maximizing cumulative rewards (i.e., minimizing total costs). During training, the  $\varepsilon$ -greedy strategy balances exploration and exploitation, selecting a random action with certain probability or otherwise choosing the action with the highest current Q-value. Network parameters are updated by minimizing the temporal-difference (TD) error, and the target Q-values are calculated using a separately updated target network to stabilize training.

(3) A2C (Advantage Actor-Critic) (Mohamadi et al., 2024): A policy gradient-based on-policy reinforcement learning algorithm that employs a shared network architecture to jointly optimize the policy function and value function. The Actor network outputs the parameters of a Gaussian distribution (mean  $\mu$  and standard deviation  $\sigma$ ) over the continuous action space for replenishment, with reparameterization techniques used for differentiable sampling. The Critic network evaluates the state value function  $V(\mathbf{S})$ , and shares lower layers with the Actor to improve training efficiency. A2C uses Generalized Advantage Estimation (GAE),  $A_t^{GAE} = \sum_{l=0}^{T-t} (\gamma\lambda)^l \delta_{t+l}$ , which balances bias and variance by incorporating multi-step returns. An entropy regularization term  $H(\pi(\cdot|\mathbf{S}))$  is added to prevent premature convergence to local optima. Gradient clipping and advantage normalization are also applied. The optimization objective is:  $J(\theta) = \mathbb{E}[\log \pi(a|\mathbf{S})A_t + \beta H(\pi)]$ . This approach learns adaptive replenishment policies under stochastic demand, and the shared network architecture improves training efficiency.

(4) SAC (Soft Actor-Critic) (Kou et al., 2025): This is an off-policy algorithm based on the maximum entropy reinforcement learning framework. Its key feature is the dual objec-

tive of maximizing both expected returns and policy entropy. Unlike traditional Actor-Critic methods such as A2C, SAC employs a stochastic policy instead of a deterministic one, encouraging exploration through entropy regularization. The Actor network outputs a probability distribution (e.g., Gaussian) from which continuous replenishment actions are sampled, overcoming the granularity limitations of discretization in DQN. Two independent Critic networks (Q-functions) and a temperature parameter  $\alpha$  are used to dynamically balance exploration and exploitation. In inventory management applications, SAC’s entropy-maximization design enhances its adaptability to demand fluctuations and non-stationary environments. The SAC objective is expressed as:  $J(\pi) = \mathbb{E}[\Sigma(r(\mathbf{S}, a) + \alpha H(\pi(\cdot|\mathbf{S})))]$ , where  $H(\pi)$  denotes policy entropy and  $\alpha$  automatically adjusts the degree of exploration.

(5) PPO (Proximal Policy Optimization) (Schulman et al., 2017): This method strikes a balance between training stability and decision accuracy via constrained policy updates and an adaptive optimization framework. The core innovation lies in its clipped surrogate objective function:  $L^{CLIP}(\theta) = \mathbb{E}[\min(r(\theta), \text{clip}(r(\theta), 1 - \epsilon, 1 + \epsilon)) A(\mathbf{S}, a)]$ , where the policy ratio  $r(\theta) = \pi_\theta(a|\mathbf{S})/\pi_{\theta_{\text{old}}}(a|\mathbf{S})$  quantifies the extent of policy update, and the clipping threshold  $\epsilon$  (typically 0.1-0.3) constrains deviation to prevent policy oscillation, particularly in inventory settings without lead time, where abrupt changes in replenishment could destabilize the system. PPO applies multiple mini-batch updates (3-10 iterations per batch) and state-related constraints to stably extract policy gradients from limited-period observations. Its entropy regularization term  $H(\pi_\theta) = -\mathbb{E}[\Sigma_a \pi_\theta(a|\mathbf{S}) \log \pi_\theta(a|\mathbf{S})]$  dynamically adjusts exploration intensity to avoid premature convergence under non-stationary demand. While PPO sacrifices some historical data efficiency compared to off-policy methods like SAC, its hard constraint on policy update magnitude reduces the risk of policy collapse. In practice, the clipping threshold  $\epsilon$  and learning rate should be tuned based on the coefficient of demand variation:  $\epsilon = 0.1$  is recommended for high volatility, while 0.3 is suitable for stable demand to accelerate convergence.

(6) DDPG (Deep Deterministic Policy Gradient) (Lillicrap et al., 2016): This off-policy algorithm combines deep neural networks with deterministic policy gradients, directly generating continuous replenishment actions via an Actor-Critic architecture. It consists of a deterministic Actor network and a Critic network for Q-value estimation. Unlike DQN, which operates on a discrete action space, DDPG supports continuous action outputs, eliminating discretization bias. Compared with SAC’s stochastic policy, DDPG’s deterministic policy is more efficient under stable demand conditions. As the foundation of the TD3 algorithm used in this study, DDPG exhibits certain limitations in continuous action space control: it uses only a single Critic network, making its value estimation prone to overestimation. Additionally, its simultaneous updates of the Actor and Critic networks introduce instability, and it lacks the target policy smoothing regularization employed by TD3. In inventory management scenarios, DDPG demonstrates lower convergence speed and less training stability than TD3.

## Appendix F. Hyperparameter search space and selected results

Similar to De Moor et al. (2022), for each method and each hyperparameter in the experiments, a finite set of candidate values was predefined. The optimal combination was then selected based on performance on the validation set. It is worth noting that due to computational limitations, an exhaustive search over all possible combinations was infeasible. Therefore, we adopted a random grid search strategy. The results reported are relatively conservative, and more extensive hyperparameter tuning could potentially further improve the performance of the proposed method.

### (1) Hyperparameter selection for WET-TD3

The hyperparameters involved in WET-TD3, along with their symbols, meanings, and search spaces, are listed in Table F.1. After repeated experimentation, we determine that across all product experiments and  $(c_h, c_b)$  combinations, the optimal values are as follows:  $\gamma = 0.83$ ;  $\mu = 0.01$ ;  $\sigma = 0.4$ ;  $\tilde{\sigma} = 0.6$ ;  $\varsigma_0 = 0.5$ ; Delay = 2;  $Ep_{\max} = 500$ ;  $T_{\max} = 100$ ;  $B_{\max} = 200$ ;  $\Delta_{\min} = 0.001$ . The values of other hyperparameters under different product and  $(c_h, c_b)$  combinations are shown in Table F.2.

**Table F.1.** Introduction to the hyperparameters of WET-TD3.

| Hyperparameter    | Symbol           | Description                                                                    | Search Range                      |
|-------------------|------------------|--------------------------------------------------------------------------------|-----------------------------------|
| Embedding Dim     | $v$              | Dimension of the trainable weight matrix $\mathbf{W}_E$ in the embedding layer | 8, 16, 20, 24, 28, 32, 36, 40, 64 |
| Encoder Layers    | $L_E$            | Number of layers in Transformer encoder                                        | 1, 2, 3, 4                        |
| Feedforward Dim   | $d_E$            | Hidden layer dimension of FFN in Transformer encoder                           | 16, 32, 64, 128, 256, 512, 1024   |
| Discount          | $\gamma$         | Discount factor                                                                | 0.80, 0.81, 0.82, ..., 0.99       |
| Update Rate       | $\mu$            | Soft update rate of target networks                                            | 0.005, 0.01, 0.05, 0.1            |
| Action noise      | $\sigma$         | Standard deviation of Gaussian noise $\varepsilon$ on action $a$               | 0.2, 0.4, 0.6, 0.8                |
| Policy noise      | $\tilde{\sigma}$ | Std. of policy noise $\varsigma$                                               | 0.2, 0.4, 0.6, 0.8                |
| Policy noise clip | $\varsigma_0$    | Clipping value for policy noise                                                | 0.5, 0.6, 0.7, 0.8                |
| Delay             | delay            | Delay steps for target network updates                                         | 1, 2, 3, 4                        |
| Max Episodes      | $Ep_{\max}$      | Maximum training episodes                                                      | 500, 1000                         |
| Max Timestep      | $T_{\max}$       | Maximum time steps per episode                                                 | 100, 200                          |
| Max Size          | $B_{\max}$       | Size of replay buffer $\mathcal{B}$                                            | 200, 300, 400                     |
| Batch Size        | $N$              | Batch size sampled per update                                                  | 8, 16, 32, 64                     |

(Continued on next page)



(Continued from previous page)

| Hyperparameter  | Symbol          | Description                                 | Search Range                                   |
|-----------------|-----------------|---------------------------------------------|------------------------------------------------|
| Learning Rate A | $lr_A$          | Learning rate for Actor and target Actor    | 1E-1, 1E-2, 5E-2, 1E-3, 5E-3, 1E-4, 5E-4, 1E-5 |
| Learning Rate Q | $lr_Q$          | Learning rate for Critic and target Critic  | 1E-1, 1E-2, 5E-2, 1E-3, 5E-3, 1E-4, 5E-4, 1E-5 |
| Min Improv      | $\Delta_{\min}$ | Minimum loss improvement for early stopping | 0.01, 0.001, 0.0001                            |
| Patience        | $P$             | Epochs to wait without improvement          | 5, 10, 15, 20, ..., 150                        |

**Table F.2.** Selected hyperparameters for training WET-TD3.

| Experiment | $(c_h, c_b)$ | $v$ | $L_E$ | $d_E$ | $N$ | $lr_A$ | $lr_Q$ | $P$ |
|------------|--------------|-----|-------|-------|-----|--------|--------|-----|
| Lavida     | (1,0.5)      | 24  | 4     | 16    | 8   | 1E-03  | 1E-02  | 70  |
|            | (1,1)        | 24  | 4     | 16    | 8   | 1E-03  | 1E-02  | 100 |
|            | (1,2)        | 20  | 1     | 64    | 64  | 1E-05  | 1E-02  | 60  |
|            | (1,5)        | 20  | 2     | 64    | 64  | 1E-05  | 1E-02  | 70  |
|            | (1,10)       | 20  | 1     | 64    | 64  | 1E-05  | 1E-02  | 70  |
|            | (1,20)       | 20  | 1     | 64    | 64  | 1E-05  | 1E-02  | 70  |
|            | (1,50)       | 20  | 1     | 128   | 64  | 1E-05  | 1E-02  | 100 |
|            | (1,100)      | 20  | 1     | 64    | 64  | 1E-05  | 1E-02  | 50  |
| Emgrand    | (1,0.5)      | 24  | 4     | 16    | 8   | 1E-03  | 1E-02  | 100 |
|            | (1,1)        | 24  | 1     | 1024  | 32  | 1E-03  | 1E-02  | 20  |
|            | (1,2)        | 24  | 1     | 512   | 32  | 1E-05  | 1E-02  | 20  |
|            | (1,5)        | 24  | 1     | 64    | 64  | 1E-05  | 1E-02  | 100 |
|            | (1,10)       | 24  | 1     | 64    | 64  | 1E-05  | 1E-02  | 100 |
|            | (1,20)       | 24  | 1     | 512   | 32  | 1E-05  | 1E-02  | 20  |
|            | (1,50)       | 24  | 1     | 512   | 64  | 1E-05  | 1E-02  | 50  |
|            | (1,100)      | 24  | 1     | 256   | 32  | 1E-03  | 1E-02  | 50  |
| Haval H6   | (1,0.5)      | 20  | 1     | 64    | 16  | 1E-03  | 1E-02  | 20  |
|            | (1,1)        | 20  | 1     | 64    | 64  | 1E-03  | 1E-02  | 10  |
|            | (1,2)        | 16  | 1     | 16    | 64  | 1E-03  | 1E-02  | 30  |
|            | (1,5)        | 20  | 1     | 128   | 8   | 1E-03  | 1E-02  | 100 |
|            | (1,10)       | 16  | 1     | 16    | 16  | 1E-03  | 1E-02  | 10  |
|            | (1,20)       | 16  | 1     | 16    | 16  | 1E-03  | 1E-02  | 100 |
|            | (1,50)       | 16  | 1     | 16    | 8   | 1E-03  | 1E-02  | 135 |
|            | (1,100)      | 16  | 1     | 16    | 8   | 1E-03  | 1E-02  | 30  |

(Continued on next page)

(Continued from previous page)

| <b>Experiment</b> | $(c_h, c_b)$ | $v$ | $L_E$ | $d_E$ | $N$ | $lr_A$ | $lr_Q$ | $P$ |
|-------------------|--------------|-----|-------|-------|-----|--------|--------|-----|
| Camry             | (1,0.5)      | 16  | 1     | 16    | 8   | 1E-03  | 1E-02  | 10  |
|                   | (1,1)        | 24  | 1     | 128   | 32  | 1E-03  | 1E-02  | 10  |
|                   | (1,2)        | 24  | 1     | 64    | 32  | 1E-03  | 1E-02  | 20  |
|                   | (1,5)        | 16  | 1     | 16    | 32  | 1E-03  | 1E-02  | 20  |
|                   | (1,10)       | 16  | 1     | 64    | 32  | 1E-03  | 1E-02  | 20  |
|                   | (1,20)       | 16  | 1     | 64    | 32  | 1E-04  | 1E-02  | 10  |
|                   | (1,50)       | 16  | 1     | 16    | 64  | 1E-04  | 1E-03  | 50  |
|                   | (1,100)      | 20  | 1     | 64    | 64  | 1E-04  | 1E-01  | 10  |

(2) Hyperparameter selection for No\_Feat

The hyperparameters involved in No\_Feat, along with their symbols, meanings, and search ranges, are the same as in Table F.1. After repeated experiments, the optimal values for all product experiments and  $(c_h, c_b)$  combinations are:  $\gamma = 0.83$ ;  $\mu = 0.01$ ;  $\sigma = 0.4$ ;  $\tilde{\sigma} = 0.6$ ;  $\varsigma_0 = 0.5$ ; Delay = 2;  $Ep_{\max} = 500$ ;  $T_{\max} = 100$ ;  $B_{\max} = 200$ ;  $\Delta_{\min} = 0.001$ . The values of other hyperparameters under different products and  $(c_h, c_b)$  combinations are shown in Table F.3.

**Table F.3.** Selected hyperparameters for training No\_Feat.

| <b>Experiment</b> | $(c_h, c_b)$ | $v$ | $L_E$ | $d_E$ | $N$ | $lr_A$ | $lr_Q$ | $P$ |
|-------------------|--------------|-----|-------|-------|-----|--------|--------|-----|
| Lavida            | (1,0.5)      | 24  | 4     | 16    | 8   | 1E-03  | 1E-02  | 100 |
|                   | (1,1)        | 24  | 4     | 16    | 8   | 1E-03  | 1E-02  | 100 |
|                   | (1,2)        | 20  | 1     | 64    | 64  | 1E-05  | 1E-02  | 100 |
|                   | (1,5)        | 20  | 2     | 64    | 64  | 1E-05  | 1E-02  | 100 |
|                   | (1,10)       | 20  | 1     | 64    | 64  | 1E-05  | 1E-02  | 100 |
|                   | (1,20)       | 20  | 1     | 64    | 64  | 1E-05  | 1E-02  | 100 |
|                   | (1,50)       | 20  | 1     | 64    | 64  | 1E-05  | 1E-02  | 100 |
|                   | (1,100)      | 20  | 1     | 64    | 64  | 1E-04  | 1E-02  | 100 |
| Emgrand           | (1,0.5)      | 24  | 4     | 16    | 8   | 1E-03  | 1E-02  | 100 |
|                   | (1,1)        | 8   | 1     | 64    | 8   | 1E-03  | 1E-02  | 100 |
|                   | (1,2)        | 24  | 1     | 256   | 64  | 1E-05  | 1E-02  | 100 |
|                   | (1,5)        | 24  | 1     | 64    | 64  | 1E-05  | 1E-02  | 100 |
|                   | (1,10)       | 24  | 1     | 64    | 64  | 1E-05  | 1E-02  | 100 |
|                   | (1,20)       | 24  | 1     | 64    | 64  | 1E-05  | 1E-02  | 100 |
|                   | (1,50)       | 16  | 1     | 64    | 64  | 1E-05  | 1E-02  | 100 |
|                   | (1,100)      | 16  | 1     | 64    | 64  | 1E-05  | 1E-02  | 100 |
| Haval H6          | (1,0.5)      | 20  | 1     | 16    | 8   | 1E-03  | 1E-02  | 100 |
|                   | (1,1)        | 20  | 1     | 64    | 64  | 1E-03  | 1E-02  | 100 |

(Continued on next page)

| <b>Experiment</b> | $(c_h, c_b)$ | $v$ | $L_E$ | $d_E$ | $N$ | $lr_A$ | $lr_Q$ | $P$ |
|-------------------|--------------|-----|-------|-------|-----|--------|--------|-----|
| Camry             | (1,2)        | 16  | 1     | 64    | 8   | 1E-03  | 1E-02  | 100 |
|                   | (1,5)        | 24  | 1     | 128   | 16  | 1E-04  | 1E-02  | 200 |
|                   | (1,10)       | 16  | 1     | 64    | 8   | 1E-03  | 1E-02  | 100 |
|                   | (1,20)       | 24  | 1     | 64    | 8   | 1E-05  | 1E-02  | 100 |
|                   | (1,50)       | 24  | 1     | 64    | 8   | 1E-05  | 1E-02  | 100 |
|                   | (1,100)      | 24  | 3     | 64    | 64  | 1E-05  | 1E-02  | 100 |
|                   | (1,0.5)      | 24  | 4     | 16    | 8   | 1E-03  | 1E-02  | 100 |
|                   | (1,1)        | 8   | 1     | 64    | 8   | 1E-03  | 1E-02  | 100 |
|                   | (1,2)        | 16  | 1     | 64    | 64  | 1E-03  | 1E-02  | 20  |
|                   | (1,5)        | 24  | 1     | 64    | 64  | 1E-05  | 1E-02  | 100 |
|                   | (1,10)       | 24  | 1     | 64    | 64  | 1E-05  | 1E-02  | 100 |
|                   | (1,20)       | 24  | 1     | 64    | 64  | 1E-04  | 1E-02  | 10  |
|                   | (1,50)       | 16  | 1     | 64    | 64  | 1E-04  | 1E-03  | 20  |
|                   | (1,100)      | 20  | 1     | 64    | 64  | 1E-04  | 1E-01  | 10  |

### (3) Hyperparameter selection for No\_Rev

The hyperparameters involved in No\_Rev, along with their symbols, meanings, and search ranges, are the same as in Table F.1, except that it does not include the hyperparameters Embedding Dim, Encoder Layers, and Feedforward Dim. After repeated experiments, the optimal values across all product experiments and  $(c_h, c_b)$  combinations are:  $\mu = 0.01$ ;  $\sigma = 0.4$ ;  $\tilde{\sigma} = 0.6$ ;  $\varsigma_0 = 0.5$ ; Delay = 2;  $Ep_{\max} = 500$ ;  $T_{\max} = 100$ ;  $B_{\max} = 200$ ;  $\Delta_{\min} = 0.001$ . Other hyperparameter values are shown in Table F.4.

**Table F.4.** Selected hyperparameters for training No\_Rev.

| <b>Experiment</b> | $(c_h, c_b)$ | $\gamma$ | $N$ | $lr_A$ | $lr_Q$ | $P$ |
|-------------------|--------------|----------|-----|--------|--------|-----|
| Lavida            | (1,0.5)      | 0.83     | 64  | 1E-04  | 5E-02  | 100 |
|                   | (1,1)        | 0.83     | 64  | 1E-03  | 1E-03  | 100 |
|                   | (1,2)        | 0.83     | 64  | 1E-03  | 5E-02  | 100 |
|                   | (1,5)        | 0.92     | 64  | 1E-03  | 1E-04  | 100 |
|                   | (1,10)       | 0.83     | 64  | 1E-05  | 1E-03  | 100 |
|                   | (1,20)       | 0.92     | 64  | 1E-05  | 1E-02  | 100 |
|                   | (1,50)       | 0.83     | 64  | 1E-05  | 1E-02  | 50  |
|                   | (1,100)      | 0.83     | 64  | 1E-04  | 1E-02  | 100 |
| Emgrand           | (1,0.5)      | 0.83     | 64  | 1E-03  | 5E-02  | 100 |
|                   | (1,1)        | 0.83     | 64  | 1E-05  | 1E-02  | 100 |
|                   | (1,2)        | 0.83     | 64  | 1E-04  | 1E-02  | 100 |
|                   | (1,5)        | 0.83     | 64  | 1E-03  | 1E-02  | 100 |

(Continued on next page)

| Experiment | $(c_h, c_b)$ | $\gamma$ | $N$ | $lr_A$ | $lr_Q$ | $P$ |
|------------|--------------|----------|-----|--------|--------|-----|
| Haval H6   | (1,10)       | 0.83     | 64  | 1E-05  | 1E-03  | 100 |
|            | (1,20)       | 0.92     | 64  | 1E-05  | 1E-02  | 100 |
|            | (1,50)       | 0.83     | 64  | 1E-05  | 1E-02  | 100 |
|            | (1,100)      | 0.83     | 64  | 1E-05  | 1E-02  | 100 |
|            | (1,0.5)      | 0.83     | 64  | 1E-03  | 5E-02  | 100 |
|            | (1,1)        | 0.83     | 64  | 1E-03  | 1E-03  | 100 |
|            | (1,2)        | 0.83     | 64  | 1E-03  | 5E-02  | 100 |
|            | (1,5)        | 0.83     | 64  | 1E-03  | 1E-03  | 100 |
|            | (1,10)       | 0.83     | 64  | 1E-05  | 1E-03  | 100 |
|            | (1,20)       | 0.83     | 64  | 1E-03  | 1E-03  | 100 |
| Camry      | (1,50)       | 0.83     | 64  | 1E-05  | 1E-03  | 100 |
|            | (1,100)      | 0.83     | 64  | 1E-05  | 1E-03  | 100 |
|            | (1,0.5)      | 0.83     | 64  | 1E-03  | 5E-02  | 100 |
|            | (1,1)        | 0.83     | 64  | 1E-05  | 1E-02  | 100 |
|            | (1,2)        | 0.83     | 64  | 1E-04  | 1E-02  | 100 |
|            | (1,5)        | 0.83     | 64  | 1E-03  | 1E-02  | 100 |
|            | (1,10)       | 0.83     | 32  | 1E-03  | 1E-02  | 50  |
|            | (1,20)       | 0.83     | 64  | 1E-02  | 1E-01  | 50  |
|            | (1,50)       | 0.83     | 8   | 1E-02  | 1E-01  | 50  |
|            | (1,100)      | 0.83     | 8   | 1E-02  | 1E-01  | 50  |

#### (4) Hyperparameter selection for DDPG

The hyperparameters involved in DDPG, along with their symbols, meanings, and search ranges, are the same as in Table F.1, except that it does not include the hyperparameters Embedding Dim, Encoder Layers, Feedforward Dim, and delay. After repeated experiments, the optimal values across all product experiments and  $(c_h, c_b)$  combinations are:  $\mu = 0.01$ ;  $\sigma = 0.4$ ;  $\tilde{\sigma} = 0.6$ ;  $\varsigma_0 = 0.5$ ;  $Ep_{\max} = 500$ ;  $T_{\max} = 100$ ;  $B_{\max} = 200$ ;  $N = 64$ ;  $\Delta_{\min} = 0.001$ . Other hyperparameter values are shown in Table F.5.

**Table F.5.** Selected hyperparameters for training DDPG.

| Experiment | $(c_h, c_b)$ | $\gamma$ | $lr_A$ | $lr_Q$ | $P$ |
|------------|--------------|----------|--------|--------|-----|
| Lavida     | (1,0.5)      | 0.83     | 1E-03  | 1E-04  | 50  |
|            | (1,1)        | 0.83     | 1E-03  | 1E-04  | 50  |
|            | (1,2)        | 0.83     | 1E-03  | 1E-03  | 50  |
|            | (1,5)        | 0.92     | 1E-03  | 1E-03  | 50  |
|            | (1,10)       | 0.83     | 1E-03  | 1E-03  | 50  |
|            | (1,20)       | 0.83     | 1E-03  | 1E-03  | 50  |

(Continued on next page)

| <b>Experiment</b> | $(c_h, c_b)$ | $\gamma$ | $lr_A$ | $lr_Q$ | $P$ |
|-------------------|--------------|----------|--------|--------|-----|
| Emgrand           | (1,50)       | 0.83     | 1E-03  | 1E-03  | 50  |
|                   | (1,100)      | 0.83     | 1E-03  | 1E-03  | 50  |
|                   | (1,0.5)      | 0.83     | 1E-03  | 5E-02  | 100 |
|                   | (1,1)        | 0.83     | 1E-05  | 1E-02  | 100 |
|                   | (1,2)        | 0.83     | 1E-03  | 1E-02  | 50  |
|                   | (1,5)        | 0.83     | 1E-04  | 1E-02  | 50  |
|                   | (1,10)       | 0.83     | 1E-05  | 1E-03  | 100 |
|                   | (1,20)       | 0.92     | 1E-05  | 1E-02  | 100 |
| Haval H6          | (1,50)       | 0.83     | 1E-05  | 1E-03  | 50  |
|                   | (1,100)      | 0.83     | 1E-04  | 1E-03  | 50  |
|                   | (1,0.5)      | 0.83     | 1E-03  | 5E-02  | 100 |
|                   | (1,1)        | 0.83     | 1E-03  | 1E-03  | 100 |
|                   | (1,2)        | 0.83     | 1E-03  | 5E-02  | 100 |
|                   | (1,5)        | 0.83     | 1E-03  | 1E-03  | 100 |
|                   | (1,10)       | 0.83     | 1E-05  | 1E-03  | 100 |
|                   | (1,20)       | 0.83     | 1E-03  | 1E-03  | 100 |
| Camry             | (1,50)       | 0.83     | 1E-05  | 1E-03  | 100 |
|                   | (1,100)      | 0.83     | 1E-05  | 1E-03  | 100 |
|                   | (1,0.5)      | 0.83     | 1E-03  | 5E-02  | 100 |
|                   | (1,1)        | 0.83     | 1E-03  | 1E-03  | 100 |
|                   | (1,2)        | 0.83     | 1E-03  | 5E-02  | 100 |
|                   | (1,5)        | 0.83     | 1E-03  | 1E-03  | 100 |
|                   | (1,10)       | 0.83     | 1E-03  | 1E-02  | 50  |
|                   | (1,20)       | 0.83     | 5E-03  | 1E-02  | 50  |
|                   | (1,50)       | 0.83     | 1E-02  | 1E-01  | 50  |
|                   | (1,100)      | 0.83     | 1E-02  | 1E-01  | 50  |

(5) *Hyperparameter selection for EAS\_Same*

The hyperparameters involved in EAS\_Same, along with their symbols, meanings, and search ranges, are listed in Table F.6. After repeated experiments, the optimal values across all product experiments are:  $v = 16$ ;  $d_E = 64$ ;  $Ep_{\max} = 500$ ;  $N = 64$ ;  $\Delta_{\min} = 0.001$ . Other values are shown in Table F.7.

**Table F.6.** Introduction to the hyperparameters of EAS\_Same

| Hyperparameter Name | Symbol          | Meaning                                                                             | Search Space                                   |
|---------------------|-----------------|-------------------------------------------------------------------------------------|------------------------------------------------|
| Embedding Dim       | $v$             | Dimension of the trainable weight matrix $\mathbf{W}_E$ in the word embedding layer | 8, 16, 20, 24, 28, 32, 36, 40, 64              |
| Encoder Layers      | $L_E$           | Number of Transformer encoder layers                                                | 1, 2, 3, 4                                     |
| Feedforward Dim     | $d_E$           | Dimension of the hidden layer in the Transformer encoder's feedforward network      | 16, 32, 64, 128, 256, 512, 1024                |
| Max Episodes        | $Ep_{\max}$     | Maximum number of training episodes                                                 | 500, 1000                                      |
| Batch Size          | $N$             | Batch size per iteration                                                            | 8, 16, 32, 64                                  |
| Learning Rate       | $lr$            | Learning rate                                                                       | 1E-1, 1E-2, 5E-2, 1E-3, 5E-3, 1E-4, 5E-4, 1E-5 |
| Min Improv          | $\Delta_{\min}$ | Minimum improvement in loss for early stopping                                      | 0.01, 0.001, 0.0001                            |
| Patience            | $P$             | Number of epochs allowed without validation improvement                             | 5, 10, 15, 20, ..., 150                        |

**Table F.7.** Selected hyperparameters for training EAS\_Same.

| Experiment | $L_E$ | $lr$  | $P$ |
|------------|-------|-------|-----|
| Lavida     | 2     | 0.01  | 100 |
| Emgrand    | 2     | 0.01  | 100 |
| Haval H6   | 1     | 0.001 | 100 |
| Camry      | 1     | 0.01  | 50  |

(6) *Hyperparameter selection for DQN*

The hyperparameters involved in DQN, along with their symbols, meanings, and search ranges, are listed in Table F.8. After repeated experiments, the optimal values across all product experiments and  $(c_h, c_b)$  combinations are:  $Ep_{\max} = 500$ ;  $B_{\max} = 200$ ;  $N = 64$ ;  $\Delta_{\min} = 0.001$ ;  $P = 50$ . Other values are shown in Table F.9.

**Table D.8.** Introduction to the hyperparameters of DQN.

| Hyperparameter Name | Symbol          | Meaning                                                 | Search Space                                   |
|---------------------|-----------------|---------------------------------------------------------|------------------------------------------------|
| Discount            | $\gamma$        | Discount factor                                         | 0.80, 0.81, 0.82, ..., 0.99                    |
| Epsilon             | $\varepsilon$   | Exploration probability in $\varepsilon$ -greedy policy | 0.001, 0.005, 0.01, 0.05, 0.1                  |
| Delay               | delay           | Steps before target network update                      | 1, 2, 3, 4                                     |
| Max Episodes        | $Ep_{\max}$     | Maximum training episodes                               | 500, 1000                                      |
| Max Size            | $B_{\max}$      | Size of replay buffer $\mathcal{B}$                     | 200, 300, 400                                  |
| Batch Size          | $N$             | Sample batch size from experience buffer                | 8, 16, 32, 64                                  |
| Learning Rate       | $lr$            | Learning rate                                           | 1E-1, 1E-2, 5E-2, 1E-3, 5E-3, 1E-4, 5E-4, 1E-5 |
| Min Improv          | $\Delta_{\min}$ | Minimum loss improvement for early stopping             | 0.01, 0.001, 0.0001                            |
| Patience            | $P$             | Epochs allowed without validation improvement           | 5, 10, 15, 20, ..., 150                        |

**Table D.9.** Selected hyperparameters for training DQN.

| Experiment | $(c_h, c_b)$ | $\gamma$ | $\varepsilon$ | delay | $lr$  |
|------------|--------------|----------|---------------|-------|-------|
| Lavida     | (1,0.5)      | 0.83     | 0.01          | 2     | 1E-03 |
|            | (1,1)        | 0.83     | 0.01          | 2     | 1E-03 |
|            | (1,2)        | 0.83     | 0.01          | 2     | 1E-03 |
|            | (1,5)        | 0.83     | 0.01          | 2     | 1E-03 |
|            | (1,10)       | 0.83     | 0.01          | 2     | 1E-03 |
|            | (1,20)       | 0.83     | 0.01          | 2     | 1E-02 |
|            | (1,50)       | 0.83     | 0.01          | 2     | 1E-03 |
|            | (1,100)      | 0.83     | 0.01          | 2     | 1E-03 |
| Emgrand    | (1,0.5)      | 0.83     | 0.01          | 2     | 1E-03 |
|            | (1,1)        | 0.83     | 0.01          | 2     | 1E-03 |
|            | (1,2)        | 0.83     | 0.01          | 2     | 1E-03 |
|            | (1,5)        | 0.90     | 0.01          | 2     | 1E-03 |
|            | (1,10)       | 0.83     | 0.01          | 2     | 1E-03 |

*(Continued on next page)*

| Experiment | $(c_h, c_b)$ | $\gamma$ | $\varepsilon$ | delay | $lr$  |
|------------|--------------|----------|---------------|-------|-------|
| Haval H6   | (1,20)       | 0.92     | 0.01          | 2     | 1E-03 |
|            | (1,50)       | 0.83     | 0.01          | 2     | 1E-03 |
|            | (1,100)      | 0.83     | 0.01          | 2     | 1E-03 |
|            | (1,0.5)      | 0.83     | 0.01          | 2     | 1E-02 |
|            | (1,1)        | 0.83     | 0.01          | 2     | 1E-02 |
|            | (1,2)        | 0.80     | 0.01          | 2     | 1E-02 |
|            | (1,5)        | 0.95     | 0.01          | 2     | 1E-03 |
|            | (1,10)       | 0.83     | 0.01          | 2     | 5E-03 |
|            | (1,20)       | 0.95     | 0.01          | 2     | 1E-02 |
|            | (1,50)       | 0.90     | 0.01          | 2     | 1E-03 |
| Camry      | (1,100)      | 0.90     | 0.01          | 2     | 1E-03 |
|            | (1,0.5)      | 0.83     | 0.01          | 2     | 1E-03 |
|            | (1,1)        | 0.83     | 0.01          | 2     | 1E-03 |
|            | (1,2)        | 0.83     | 0.01          | 2     | 1E-03 |
|            | (1,5)        | 0.83     | 0.01          | 2     | 1E-03 |
|            | (1,10)       | 0.99     | 0.01          | 2     | 1E-03 |
|            | (1,20)       | 0.99     | 0.001         | 3     | 1E-01 |
|            | (1,50)       | 0.99     | 0.001         | 4     | 1E-01 |
|            | (1,100)      | 0.90     | 0.001         | 2     | 1E-01 |

(7) *Hyperparameter selection for A2C*

The hyperparameters involved in A2C, along with their symbols, meanings, and search ranges, are listed in Table F.10. After repeated experiments, the optimal values across all product experiments and  $(c_h, c_b)$  combinations are:  $Ep_{\max} = 500$ ;  $T_{\max} = 200$ ;  $\Delta_{\min} = 0.001$ ;  $P = 50$ . Other values are shown in Table F.11.

**Table D.10.** Introduction to the hyperparameters of A2C.

| Hyperparameter Name | Symbol      | Meaning                                         | Search Space                   |
|---------------------|-------------|-------------------------------------------------|--------------------------------|
| Discount            | $\gamma$    | Discount factor                                 | 0.80, 0.81, 0.82, ..., 0.99    |
| Entropy Coefficient | $\beta$     | Entropy regularization to encourage exploration | 0.001, 0.01, 0.1               |
| Max Episodes        | $Ep_{\max}$ | Maximum training episodes                       | 500, 1000                      |
| GAE Lambda          | $\lambda$   | GAE bias-variance tradeoff parameter            | 0.5, 1.0, 1.5, ..., 0.95, 0.99 |

(Continued on next page)



| Hyperparameter Name | Symbol     | Meaning                                       | Search Space                                   |
|---------------------|------------|-----------------------------------------------|------------------------------------------------|
| Batch Size          | $N$        | Training batch size per iteration             | 8, 16, 32, 64                                  |
| Learning Rate       | $lr$       | Learning rate                                 | 1E-1, 1E-2, 5E-2, 1E-3, 5E-3, 1E-4, 5E-4, 1E-5 |
| Max Timestep        | $T_{\max}$ | Maximum training steps per episode            | 100, 200                                       |
| Patience            | $P$        | Epochs allowed without validation improvement | 5, 10, 15, 20, ..., 150                        |

**Table D.11.** Selected hyperparameters for training A2C.

| Experiment | $(c_h, c_b)$ | $\gamma$ | $\beta$ | $lr$  | $\lambda$ | $N$ |
|------------|--------------|----------|---------|-------|-----------|-----|
| Lavida     | (1,0.5)      | 0.99     | 0.01    | 1E-02 | 0.95      | 32  |
|            | (1,1)        | 0.99     | 0.01    | 1E-02 | 0.95      | 32  |
|            | (1,2)        | 0.99     | 0.01    | 1E-02 | 0.95      | 32  |
|            | (1,5)        | 0.99     | 0.01    | 1E-02 | 0.95      | 32  |
|            | (1,10)       | 0.99     | 0.01    | 1E-01 | 0.90      | 64  |
|            | (1,20)       | 0.99     | 0.01    | 5E-02 | 0.80      | 64  |
|            | (1,50)       | 0.99     | 0.001   | 1E-01 | 0.70      | 64  |
|            | (1,100)      | 0.99     | 0.01    | 5E-02 | 0.83      | 64  |
| Emgrand    | (1,0.5)      | 0.90     | 0.01    | 5E-03 | 0.95      | 64  |
|            | (1,1)        | 0.90     | 0.01    | 5E-03 | 0.95      | 64  |
|            | (1,2)        | 0.90     | 0.01    | 5E-03 | 0.95      | 64  |
|            | (1,5)        | 0.83     | 0.01    | 1E-02 | 0.95      | 64  |
|            | (1,10)       | 0.90     | 0.001   | 1E-02 | 0.99      | 64  |
|            | (1,20)       | 0.90     | 0.01    | 1E-01 | 0.80      | 64  |
|            | (1,50)       | 0.95     | 0.001   | 5E-02 | 0.85      | 64  |
|            | (1,100)      | 0.90     | 0.001   | 1E-01 | 0.80      | 64  |
| Haval H6   | (1,0.5)      | 0.83     | 0.01    | 1E-02 | 0.95      | 32  |
|            | (1,1)        | 0.83     | 0.01    | 1E-02 | 0.95      | 32  |
|            | (1,2)        | 0.99     | 0.01    | 1E-03 | 0.99      | 64  |
|            | (1,5)        | 0.99     | 0.01    | 1E-02 | 0.95      | 64  |
|            | (1,10)       | 0.80     | 0.001   | 1E-01 | 0.95      | 64  |
|            | (1,20)       | 0.99     | 0.01    | 1E-01 | 0.85      | 64  |
|            | (1,50)       | 0.85     | 0.001   | 1E-01 | 0.80      | 64  |

(Continued on next page)

| Experiment | $(c_h, c_b)$ | $\gamma$ | $\beta$ | $lr$  | $\lambda$ | $N$ |
|------------|--------------|----------|---------|-------|-----------|-----|
| Camry      | (1,100)      | 0.99     | 0.001   | 1E-02 | 0.95      | 64  |
|            | (1,0.5)      | 0.83     | 0.01    | 1E-02 | 0.95      | 64  |
|            | (1,1)        | 0.83     | 0.01    | 1E-02 | 0.99      | 64  |
|            | (1,2)        | 0.99     | 0.01    | 1E-02 | 0.99      | 64  |
|            | (1,5)        | 0.95     | 0.001   | 5E-02 | 0.85      | 64  |
|            | (1,10)       | 0.99     | 0.001   | 5E-02 | 0.99      | 64  |
|            | (1,20)       | 0.99     | 0.001   | 5E-02 | 0.99      | 64  |
|            | (1,50)       | 0.99     | 0.01    | 1E-01 | 0.85      | 64  |
|            | (1,100)      | 0.97     | 0.01    | 5E-02 | 0.50      | 64  |

(8) *Hyperparameter selection for SAC*

The hyperparameters involved in SAC, along with their symbols, meanings, and search ranges, are listed in Table F.12. After repeated experiments, the optimal values across all product experiments and  $(c_h, c_b)$  combinations are:  $\gamma = 0.83$ ;  $\mu = 0.01$ ;  $Ep_{\max} = 500$ ;  $T_{\max} = 100$ ;  $B_{\max} = 200$ ;  $\Delta_{\min} = 0.001$ . Other values are shown in Table F.13.

**Table F.12.** Introduction to the hyperparameters of SAC.

| Hyperparameter Name | Symbol          | Meaning                                       | Search Space                                   |
|---------------------|-----------------|-----------------------------------------------|------------------------------------------------|
| Discount            | $\gamma$        | Discount factor                               | 0.080, 0.81, 0.82, ..., 0.99                   |
| Update Rate         | $\mu$           | Target network soft update rate               | 0.001, 0.005, 0.01, 0.05, 0.1                  |
| Max Episodes        | $Ep_{\max}$     | Maximum training episodes                     | 500, 1000                                      |
| Max Timestep        | $T_{\max}$      | Maximum steps per episode                     | 100, 200                                       |
| Max Size            | $B_{\max}$      | Replay buffer size $\mathcal{B}$              | 200, 300, 400                                  |
| Batch Size          | $N$             | Batch size per iteration                      | 8, 16, 32, 64                                  |
| Learning Rate A     | $lr_A$          | Actor and target Actor learning rate          | 1E-1, 1E-2, 5E-2, 1E-3, 5E-3, 1E-4, 5E-4, 1E-5 |
| Learning Rate Q     | $lr_Q$          | Critic and target Critic learning rate        | 1E-1, 1E-2, 5E-2, 1E-3, 5E-3, 1E-4, 5E-4, 1E-5 |
| Min Improv          | $\Delta_{\min}$ | Min loss improvement for early stop           | 0.01, 0.001, 0.0001                            |
| Patience            | $P$             | Epochs allowed without validation improvement | 5, 10, 15, 20, ..., 150                        |

**Table F.13.** Selected hyperparameters for training SAC.

| <b>Experiment</b> | $(c_h, c_b)$ | $N$ | $lr_A$ | $lr_Q$ | $P$ |
|-------------------|--------------|-----|--------|--------|-----|
| Lavida            | (1,0.5)      | 64  | 1E-04  | 1E-03  | 50  |
|                   | (1,1)        | 64  | 1E-04  | 1E-03  | 20  |
|                   | (1,2)        | 64  | 1E-04  | 1E-02  | 50  |
|                   | (1,5)        | 64  | 1E-04  | 1E-04  | 50  |
|                   | (1,10)       | 64  | 1E-04  | 1E-03  | 50  |
|                   | (1,20)       | 64  | 1E-05  | 1E-02  | 100 |
|                   | (1,50)       | 64  | 1E-05  | 1E-03  | 100 |
|                   | (1,100)      | 64  | 1E-03  | 1E-02  | 50  |
| Emgrand           | (1,0.5)      | 32  | 1E-04  | 1E-03  | 50  |
|                   | (1,1)        | 64  | 1E-05  | 1E-02  | 100 |
|                   | (1,2)        | 32  | 1E-05  | 1E-03  | 50  |
|                   | (1,5)        | 64  | 1E-05  | 1E-03  | 50  |
|                   | (1,10)       | 64  | 1E-05  | 1E-03  | 50  |
|                   | (1,20)       | 64  | 1E-05  | 1E-03  | 50  |
|                   | (1,50)       | 64  | 1E-04  | 1E-02  | 50  |
|                   | (1,100)      | 64  | 1E-05  | 1E-03  | 100 |
| Haval H6          | (1,0.5)      | 64  | 1E-03  | 5E-02  | 100 |
|                   | (1,1)        | 64  | 1E-03  | 1E-03  | 100 |
|                   | (1,2)        | 64  | 1E-03  | 1E-02  | 100 |
|                   | (1,5)        | 64  | 1E-03  | 1E-03  | 100 |
|                   | (1,10)       | 64  | 1E-05  | 1E-03  | 100 |
|                   | (1,20)       | 64  | 1E-03  | 1E-03  | 100 |
|                   | (1,50)       | 64  | 1E-05  | 1E-03  | 100 |
|                   | (1,100)      | 64  | 1E-05  | 1E-03  | 100 |
| Camry             | (1,0.5)      | 64  | 1E-03  | 5E-02  | 100 |
|                   | (1,1)        | 64  | 1E-05  | 1E-02  | 100 |
|                   | (1,2)        | 64  | 1E-04  | 1E-02  | 100 |
|                   | (1,5)        | 64  | 1E-03  | 1E-02  | 100 |
|                   | (1,10)       | 32  | 1E-03  | 1E-02  | 100 |
|                   | (1,20)       | 64  | 1E-02  | 1E-01  | 100 |
|                   | (1,50)       | 32  | 1E-02  | 1E-02  | 50  |
|                   | (1,100)      | 32  | 1E-02  | 1E-02  | 50  |

*(9) Hyperparameter selection for PPO*

The hyperparameters involved in PPO, along with their symbols, meanings, and search ranges, are listed in Table F.14. After repeated experiments, the optimal values across all

product experiments and  $(c_h, c_b)$  combinations are:  $\epsilon = 0.2$ ;  $\gamma = 0.99$ ;  $Ep_{\max} = 500$ ;  $B_{\max} = 200$ ;  $N = 64$ ;  $\Delta_{\min} = 0.001$ ;  $P = 50$ . Other values are shown in Table F.15.

**Table F.14.** Introduction to the hyperparameters of PPO.

| Hyperparameter Name | Symbol      | Meaning                                       | Search Space                                   |
|---------------------|-------------|-----------------------------------------------|------------------------------------------------|
| Discount            | $\gamma$    | Discount factor                               | 0.80, 0.81, 0.82, ..., 0.99                    |
| Clip Epsilon        | $\epsilon$  | Clipping threshold for policy update          | 0.001, 0.01, 0.1                               |
| Max Episodes        | $Ep_{\max}$ | Maximum training episodes                     | 500, 1000                                      |
| GAE Lambda          | $\lambda$   | GAE bias-variance parameter                   | 0.9, 0.95, 0.99                                |
| Max Size            | $B_{\max}$  | Replay buffer size                            | 200, 300, 400                                  |
| Batch Size          | $N$         | Training batch size per iteration             | 8, 16, 32, 64                                  |
| Learning Rate A     | $lr_A$      | Policy network learning rate                  | 1E-1, 1E-2, 5E-2, 1E-3, 5E-3, 1E-4, 5E-4, 1E-5 |
| Learning Rate Q     | $lr_Q$      | Value network learning rate                   | 1E-1, 1E-2, 5E-2, 1E-3, 5E-3, 1E-4, 5E-4, 1E-5 |
| Update Epochs       | $Ep_u$      | Policy update epochs per batch                | 10, 20, 30, 40, 50                             |
| Max Timestep        | $T_{\max}$  | Max steps per episode                         | 100, 200                                       |
| Patience            | $P$         | Epochs allowed without validation improvement | 5, 10, 15, 20, ..., 150                        |

**Table F.15.** Selected hyperparameters for training PPO.

| Experiment | $(c_h, c_b)$ | $\lambda$ | $lr_A$ | $lr_Q$ | $Ep_u$ |
|------------|--------------|-----------|--------|--------|--------|
| Lavida     | (1,0.5)      | 0.95      | 1E-03  | 1E-03  | 10     |
|            | (1,1)        | 0.95      | 1E-03  | 1E-03  | 20     |
|            | (1,2)        | 0.95      | 1E-03  | 1E-03  | 40     |
|            | (1,5)        | 0.90      | 1E-03  | 1E-03  | 20     |
|            | (1,10)       | 0.95      | 1E-03  | 1E-03  | 20     |
|            | (1,20)       | 0.99      | 1E-03  | 1E-03  | 40     |
|            | (1,50)       | 0.95      | 1E-03  | 1E-03  | 20     |

(Continued on next page)

| Experiment | $(c_h, c_b)$ | $\lambda$ | $lr_A$ | $lr_Q$ | $Ep_u$ |
|------------|--------------|-----------|--------|--------|--------|
| Emgrand    | (1,100)      | 0.99      | 1E-03  | 1E-03  | 40     |
|            | (1,0.5)      | 0.99      | 1E-03  | 1E-03  | 20     |
|            | (1,1)        | 0.95      | 1E-03  | 1E-03  | 20     |
|            | (1,2)        | 0.99      | 1E-03  | 1E-03  | 20     |
|            | (1,5)        | 0.99      | 1E-03  | 1E-03  | 20     |
|            | (1,10)       | 0.99      | 1E-03  | 1E-03  | 20     |
|            | (1,20)       | 0.99      | 1E-03  | 1E-03  | 30     |
|            | (1,50)       | 0.99      | 1E-03  | 5E-03  | 30     |
| Haval H6   | (1,100)      | 0.99      | 1E-03  | 5E-03  | 40     |
|            | (1,0.5)      | 0.99      | 1E-03  | 1E-03  | 20     |
|            | (1,1)        | 0.99      | 1E-03  | 1E-03  | 20     |
|            | (1,2)        | 0.95      | 1E-03  | 1E-03  | 40     |
|            | (1,5)        | 0.99      | 1E-03  | 1E-03  | 30     |
|            | (1,10)       | 0.99      | 1E-03  | 1E-03  | 30     |
|            | (1,20)       | 0.95      | 1E-03  | 1E-03  | 10     |
|            | (1,50)       | 0.95      | 1E-03  | 1E-03  | 30     |
| Camry      | (1,100)      | 0.99      | 1E-03  | 1E-03  | 20     |
|            | (1,0.5)      | 0.95      | 1E-03  | 1E-03  | 20     |
|            | (1,1)        | 0.95      | 1E-03  | 1E-03  | 20     |
|            | (1,2)        | 0.95      | 1E-03  | 1E-03  | 20     |
|            | (1,5)        | 0.99      | 1E-03  | 1E-03  | 40     |
|            | (1,10)       | 0.99      | 5E-03  | 5E-03  | 20     |
|            | (1,20)       | 0.99      | 1E-03  | 1E-03  | 30     |
|            | (1,50)       | 0.95      | 5E-03  | 1E-02  | 40     |
|            | (1,100)      | 0.95      | 1E-01  | 1E-01  | 20     |

## References

- Arrow, K.J., Karlin, S., & Scarf, H. (1958). Studies in the Mathematical Theory of Inventory and Production. Stanford University Press.
- De Moor, B.J., Gijsbrechts, J., & Boute, R.N. (2022). Reward shaping to improve the performance of deep reinforcement learning in perishable inventory management. *European Journal of Operational Research*, 301(2), 535-545.
- Kou, A., Cheng, Y., Huang, X., & Jin, J. (2025). Dynamic replenishment policy for perishable goods using change point detection-based soft actor-critic reinforcement learning. *Expert Systems with Applications*, 270, 126556.
- Lillicrap, T.P., Hunt, J.J., Pritzel, A., Heess, N., Erez, T., Tassa, Y., Silver, D., & Wierstra, D. (2016). Continuous control with deep reinforcement learning. 4th International Conference on Learning Representations, ICLR 2016 - Conference Track Proceedings, San Juan.
- Ma, J. (2021). Variable Selection with Copula Entropy. *Chinese Journal of Applied Probability and Statistics*, 34(7), 405-420.

- Mohamadi, N., Niaki, S.T.A., Taher, M., & Shavandi, A. (2024). An application of deep reinforcement learning and vendor-managed inventory in perishable supply chain management. *Engineering Applications of Artificial Intelligence*, 127, 107403.
- Myers, J., Well, A., & Lorch, R. (2010). Research Design and Statistical Analysis, Third Edition. Routledge.
- Oroojlooyjadid, A., Nazari, M., Snyder, L.V., & Takáč, M. (2021). A deep Q-network for the beer game: Deep reinforcement learning for inventory optimization. *Manufacturing & Service Operations Management*, 24(1), 285-304.
- Rodgers, J.L., & Nicewander, W.A. (1988). Thirteen Ways to Look at the Correlation Coefficient. *The American Statistician*, 42(1), 59-66.
- Schnaubelt, M. (2022). Deep reinforcement learning for the optimal placement of cryptocurrency limit orders. *European Journal of Operational Research*, 296(3), 993-1006.
- Schulman, J., Wolski, F., Dhariwal, P., Radford, A., & Klimov, O. (2017). Proximal policy optimization algorithms. *arXiv preprint*, Article arXiv:1707.06347.
- Székely, G.J., Rizzo, M.L., & Bakirov, N.K. (2007). Measuring and testing dependence by correlation of distances. *Annals of Statistics*, 35(6), 2769-2794.
- Vaswani, A., Shazeer, N., Parmar, N., Uszkoreit, J., Jones, L., Gomez, A.N., Kaiser, Ł., & Polosukhin, I. (2017). Attention is all you need. *Advances in Neural Information Processing Systems*, NIPS 2017, Long Beach.
